# Supplementary material
Source: PubMed Central journal article supplement (PMC6283923)
Supplement: rsbl20180650supp2.pdf [file rsbl20180650supp2.pdf]

S.J. Portugal et al.

## Flight feather moult drives minimum daily heart rate in wild geese

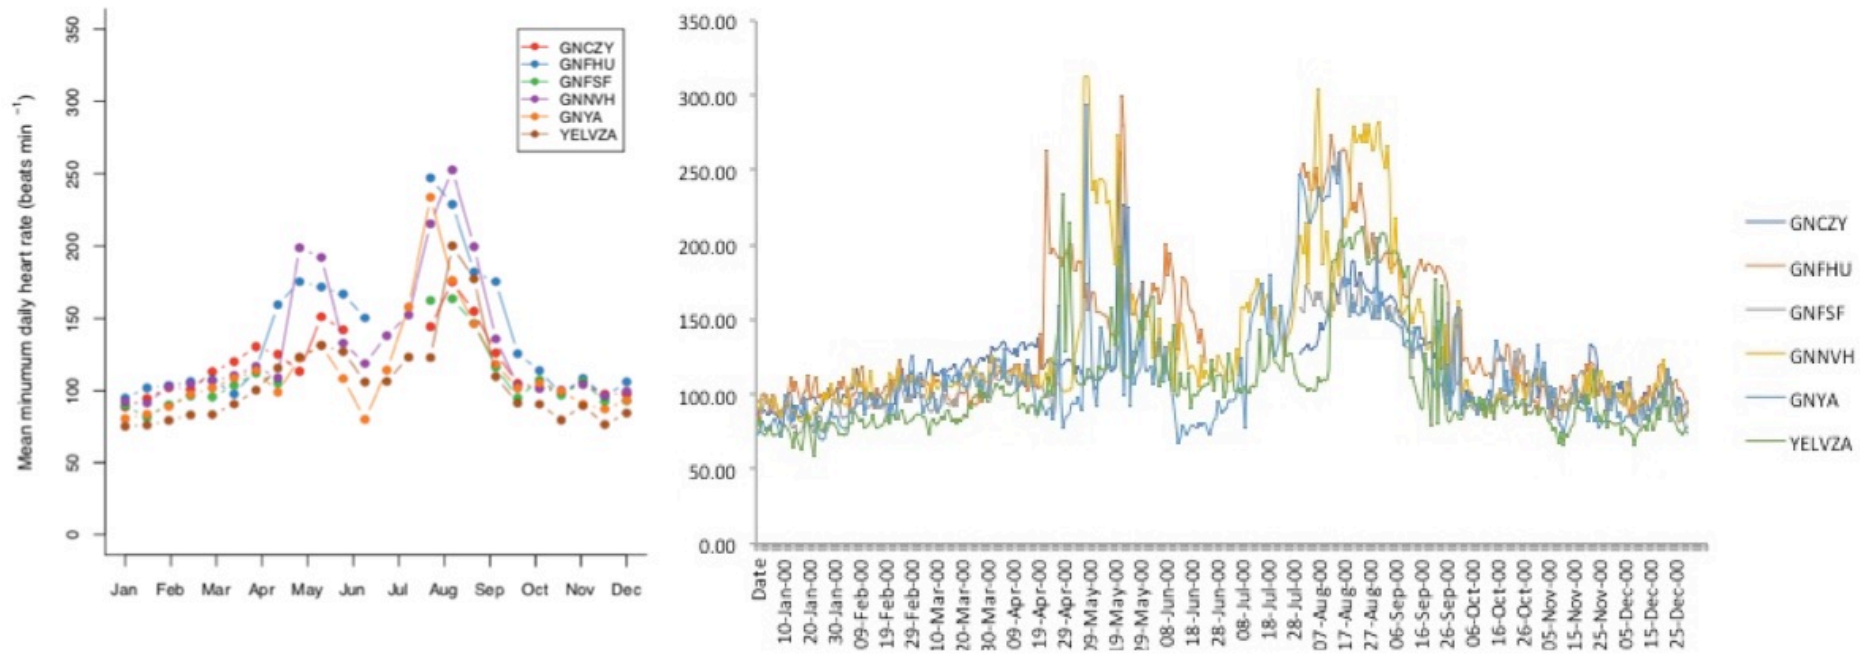

**Supplementary Figure 1.** Daily minimum heart rate per day throughout the annual cycle of six wild barnacle geese (the left panel is a simplified version of the right panel).
